# Supplementary material for: Multi-objective optimization of a fluid catalytic cracking unit using response surface methodology
Source: publisher site journal article supplement (doi:10.1515/cppm-2022-0018), 2022-11-18
Supplement: Supplementary file 1 [file j_cppm-2022-0018_suppl.docx]

**List of Supplementary material**

**S1.** Optimization ramps showing optimized process conditions using CCD for objective 1

**S2.** Desirability plot showing optimized process conditions using CCD for objective 1

**S3.** Optimization ramps showing optimized process conditions using CCD for objective 2

**S4.** Desirability plot showing optimized process conditions using CCD for objective 2

**S5.** Optimization ramps showing optimized process conditions using CCD for objective 3

**S6.** Desirability plot showing optimized process conditions using CCD for objective 3

**S7.** Optimization ramps showing optimized process conditions using CCD for objective 4

**S8.** Desirability plot showing optimized process conditions using CCD for objective 4

**S9.** Optimization ramps showing optimized process conditions using CCD for objective 5

**S10.** Desirability plot showing optimized process conditions using CCD for objective 5

**S11.** Optimization ramps showing optimized process conditions using CCD for objective 6

**S12.** Desirability plot showing optimized process conditions using CCD for objective 6

**S13.** Optimization ramps showing optimized process conditions using CCD for objective 7

**S14.** Desirability plot showing optimized process conditions using CCD for objective 7

**S15.** Optimization ramps showing optimized process conditions using CCD for objective 8

**S16.** Desirability plot showing optimized process conditions using CCD for objective 8

**S17.** Optimization ramps showing optimized process conditions using CCD for objective 9

**S18.** Desirability plot showing optimized process conditions using CCD for objective 9

**S19.** Optimization ramps showing optimized process conditions using CCD for objective 10

**S20.** Desirability plot showing optimized process conditions using CCD for objective 10

**S21.** Optimization ramps showing optimized process conditions using CCD for objective 11

**S22.** Desirability plot showing optimized process conditions using CCD for objective 11

**S23.** Table: Validation of CCD model with Aspen HYSYS model values for ±12% of base case design value.

A:Feed flow rate(tonne/h) = 160.95

160

195

B:Feed temperature(K) = 588.497

481.5

588.5

C:Feed pressure(kPa) = 405.955

405

495

D:Reg air blower disch temp(K) = 474.999

388

475

E:Catalyst circulation rate(tonne/h) = 1074.81

917

1121

Light end products yield(%) = 42.7587

14.1878

49.2011

Naphtha yield(%) = 23.7819

17.1764

40.8495

Light cycle oil yield(%) = 16.3393

16.3393

22.2913

Bottoms yield(%) = 10.7663

10.6062

22.7237

Coke yield(%) = 5.35568

4.79864

6.45388

Conversion(%) = 72.8171

54.985

72.7845

Reactor outlet temperature(K) = 846.961

763.88

851.05

Desirability = 0.900

Solution 1 out of 100

S1. Optimization ramps showing optimized process conditions using CCD for objective 1

1

1

1

1

1

1

1

1

0.986795

0.663471

1

1

0.899523

Desirability

0.000

0.250

0.500

0.750

1.000

A:Feed flow rate

B:Feed temperature

C:Feed pressure

D:Reg air blower disch temp

E:Catalyst circulation rate

Light end products yield

Naphtha yield

Light cycle oil yield

Bottoms yield

Coke yield

Conversion

Reactor outlet temperature

Combined

Solution 1 out of 100

S2.Desirability plot showing optimized process conditions using CCD for objective 1

A:Feed flow rate(tonne/h) = 163.599

160

195

B:Feed temperature(K) = 588.479

481.5

588.5

C:Feed pressure(kPa) = 460.146

405

495

D:Reg air blower disch temp(K) = 474.998

388

475

E:Catalyst circulation rate(tonne/h) = 1121

917

1121

Light end products yield(%) = 45.1018

14.1878

49.2011

Naphtha yield(%) = 21.4095

17.1764

40.8495

Light cycle oil yield(%) = 16.0817

16.3393

22.2913

Bottoms yield(%) = 10.9658

10.6062

22.7237

Coke yield(%) = 5.34469

4.79864

6.45388

Conversion(%) = 72.7845

54.985

72.7845

Reactor outlet temperature(K) = 848.97

763.88

851.05

Desirability = 0.873

Solution 1 out of 100

S3. Optimization ramps showing optimized process conditions using CCD for objective 2

S4. Desirability plot showing optimized process conditions using CCD for objective 2

Solution 1 out of 100

Desirability

1

1

1

1

1

0.894825

1

1

0.970331

0.67011

1

1

0.873375

0.000

0.250

0.500

0.750

1.000

A:Feed flow rate

B:Feed temperature

C:Feed pressure

D:Reg air blower disch temp

E:Catalyst circulation rate

Light end products yield

Naphtha yield

Light cycle oil yield

Bottoms yield

Coke yield

Conversion

Reactor outlet temperature

Combined

A:Feed flow rate(tonne/h) = 160

160

195

B:Feed temperature(K) = 588.5

481.5

588.5

C:Feed pressure(kPa) = 495

405

495

D:Reg air blower disch temp(K) = 475

388

475

E:Catalyst circulation rate(tonne/h) = 1121

917

1121

Light end products yield(%) = 47.9439

14.1878

49.2011

Naphtha yield(%) = 18.9764

17.1764

40.8495

Light cycle oil yield(%) = 15.7771

16.3393

22.2913

Bottoms yield(%) = 10.8195

10.6062

22.7237

Coke yield(%) = 5.36286

4.79864

6.45388

Conversion(%) = 73.2246

54.985

72.7845

Reactor outlet temperature(K) = 851.577

763.88

851.05

Desirability = 0.925

Solution 1 out of 100

S5. Optimization ramps showing optimized process conditions using CCD for objective 3

Desirability

1

1

1

1

1

0.967892

1

1

0.982398

0.65913

1

1

0.925083

0.000

0.250

0.500

0.750

1.000

A:Feed flow rate

B:Feed temperature

C:Feed pressure

D:Reg air blower disch temp

E:Catalyst circulation rate

Light end products yield

Naphtha yield

Light cycle oil yield

Bottoms yield

Coke yield

Conversion

Reactor outlet temperature

Combined

Solution 1 out of 100

S6. Desirability plot showing optimized process conditions using CCD for objective 3

A:Feed flow rate(tonne/h) = 168.47

160

195

B:Feed temperature(K) = 588.5

481.5

588.5

C:Feed pressure(kPa) = 405.002

405

495

D:Reg air blower disch temp(K) = 474.997

388

475

E:Catalyst circulation rate(tonne/h) = 972.791

917

1121

Light end products yield(%) = 29.5836

14.1878

49.2011

Naphtha yield(%) = 34.3541

17.1764

40.8495

Light cycle oil yield(%) = 18.0378

16.3393

22.2913

Bottoms yield(%) = 11.9615

10.6062

22.7237

Coke yield(%) = 5.23574

4.79864

6.45388

Conversion(%) = 70.0367

54.985

72.7845

Reactor outlet temperature(K) = 831.125

763.88

851.05

Desirability = 0.763

Solution 1 out of 100

S7. Optimization ramps showing optimized process conditions using CCD for objective 4

1

1

1

1

1

1

0.72562

0.71463

0.888158

0.735928

1

1

0.763008

Desirability

0.000

0.250

0.500

0.750

1.000

A:Feed flow rate

B:Feed temperature

C:Feed pressure

D:Reg air blower disch temp

E:Catalyst circulation rate

Light end products yield

Naphtha yield

Light cycle oil yield

Bottoms yield

Coke yield

Conversion

Reactor outlet temperature

Combined

Solution 1 out of 100

S8. Desirability plot showing optimized process conditions using CCD for objective 4

A:Feed flow rate(tonne/h) = 160.495

160

195

B:Feed temperature(K) = 588.498

481.5

588.5

C:Feed pressure(kPa) = 405.004

405

495

D:Reg air blower disch temp(K) = 474.998

388

475

E:Catalyst circulation rate(tonne/h) = 1010.01

917

1121

Light end products yield(%) = 37.3869

14.1878

49.2011

Naphtha yield(%) = 28.4757

17.1764

40.8495

Light cycle oil yield(%) = 16.9761

16.3393

22.2913

Bottoms yield(%) = 10.9555

10.6062

22.7237

Coke yield(%) = 5.33364

4.79864

6.45388

Conversion(%) = 72.0951

54.985

72.7845

Reactor outlet temperature(K) = 841.219

763.88

851.05

Desirability = 0.756

Solution 1 out of 100

S9. Optimization ramps showing optimized process conditions using CCD for objective 5

1

1

1

1

1

0.692573

0.477306

0.893012

0.971181

0.676785

0.961271

1

0.75588

Desirability

0.000

0.250

0.500

0.750

1.000

A:Feed flow rate

B:Feed temperature

C:Feed pressure

D:Reg air blower disch temp

E:Catalyst circulation rate

Light end products yield

Naphtha yield

Light cycle oil yield

Bottoms yield

Coke yield

Conversion

Reactor outlet temperature

Combined

Solution 1 out of 100

S10. Desirability plot showing optimized process conditions using CCD for objective 5

A:Feed flow rate(tonne/h) = 194.998

160

195

B:Feed temperature(K) = 588.499

481.5

588.5

C:Feed pressure(kPa) = 405.005

405

495

D:Reg air blower disch temp(K) = 475

388

475

E:Catalyst circulation rate(tonne/h) = 965.507

917

1121

Light end products yield(%) = 19.218

14.1878

49.2011

Naphtha yield(%) = 38.9036

17.1764

40.8495

Light cycle oil yield(%) = 20.3556

16.3393

22.2913

Bottoms yield(%) = 15.9279

10.6062

22.7237

Coke yield(%) = 4.91348

4.79864

6.45388

Conversion(%)= 63.8448

54.985

72.7845

Reactor outlet temperature(K) = 810.906

763.88

851.05

Desirability = 0.706

Solution 1 out of 100

S11. Optimization ramps showing optimized process conditions using CCD for objective 6

1

1

1

1

1

1

1

0.674781

0.560826

0.930619

1

1

0.706189

Desirability

0.000

0.250

0.500

0.750

1.000

A:Feed flow rate

B:Feed temperature

C:Feed pressure

D:Reg air blower disch temp

E:Catalyst circulation rate

Light end products yield

Naphtha yield

Light cycle oil yield

Bottoms yield

Coke yield

Conversion

Reactor outlet temperature

Combined

Solution 1 out of 100

S12. Desirability plot showing optimized process conditions using CCD for objective 6

A:Feed flow rate(tonne/h) = 194.156

160

195

B:Feed temperature(K) = 541.736

481.5

588.5

C:Feed pressure(kPa) = 405.001

405

495

D:Reg air blower disch temp(K) = 388.001

388

475

E:Catalyst circulation rate (tonne/h) = 917.016

917

1121

Light end products yield(%) = 14.8979

14.1878

49.2011

Naphtha yield(%) = 37.7659

17.1764

40.8495

Light cycle oil yield(%) = 21.6361

16.3393

22.2913

Bottoms yield(%) = 19.7066

10.6062

22.7237

Coke yield(%) = 5.11849

4.79864

6.45388

Conversion(%) = 58.5502

54.985

72.7845

Reactor outlet temperature(K) = 784.44

763.88

851.05

Desirability = 0.880

Solution 1 out of 100

S13. Optimization ramps showing optimized process conditions using CCD for objective 7

1

1

1

1

1

1

0.869743

0.889912

1

1

1

1

0.87977

Desirability

0.000

0.250

0.500

0.750

1.000

A:Feed flow rate

B:Feed temperature

C:Feed pressure

D:Reg air blower disch temp

E:Catalyst circulation rate

Light end products yield

Naphtha yield

Light cycle oil yield

Bottoms yield

Coke yield

Conversion

Reactor outlet temperature

Combined

Solution 1 out of 100

S14. Desirability plot showing optimized process conditions using CCD for objective 7

A:Feed flow rate(tonne/h) = 190.423

160

195

B:Feed temperature(K) = 588.489

481.5

588.5

C:Feed pressure(kPa) = 405.027

405

495

D:Reg air blower disch temp(K) = 474.996

388

475

E:Catalyst circulation rate(tonne/h) = 1052.96

917

1121

Light end products yield(%) = 24.3407

14.1878

49.2011

Naphtha yield(%) = 37.2579

17.1764

40.8495

Light cycle oil yield(%) = 19.0578

16.3393

22.2913

Bottoms yield(%) = 13.4814

10.6062

22.7237

Coke yield(%) = 5.10101

4.79864

6.45388

Conversion(%) = 67.5356

54.985

72.7845

Reactor outlet temperature(K) = 823.872

763.88

851.05

Desirability = 0.603

Solution 1 out of 100

S15. Optimization ramps showing optimized process conditions using CCD for objective 8

1

1

1

1

1

0.848284

0.456739

0.762724

0.817326

1

1

0.603436

Desirability

0.000

0.250

0.500

0.750

1.000

A:Feed flow rate

B:Feed temperature

C:Feed pressure

D:Reg air blower disch temp

E:Catalyst circulation rate

Light end products yield

Naphtha yield

Light cycle oil yield

Bottoms yield

Coke yield

Conversion

Reactor outlet temperature

Combined

Solution 1 out of 100

0.331271

S16. Desirability plot showing optimized process conditions using CCD for objective 8

A:Feed flow rate(tonne/h) = 195

160

195

B:Feed temperature(K) = 588.443

481.5

588.5

C:Feed pressure(kPa) = 406.5

405

495

D:Reg air blower disch temp(K) = 474.993

388

475

E:Catalyst circulation rate(tonne/h) = 943.597

917

1121

Light end products yield(%) = 18.49

14.1878

49.2011

Naphtha yield(%) = 38.873

17.1764

40.8495

Light cycle oil yield(%) = 20.5848

16.3393

22.2913

Bottoms yield(%) = 16.4911

10.6062

22.7237

Coke yield(%) = 4.87214

4.79864

6.45388

Conversion(%) = 63.0405

54.985

72.7845

Reactor outlet temperature(K) = 808.192

763.88

851.05

Desirability = 0.868

Solution 1 out of 100

S17. Optimization ramps showing optimized process conditions using CCD for objective 9

1

1

1

1

1

1

0.916511

0.713287

1

1

1

1

0.867895

Desirability

0.000

0.250

0.500

0.750

1.000

A:Feed flow rate

B:Feed temperature

C:Feed pressure

D:Reg air blower disch temp

E:Catalyst circulation rate

Light end products yield

Naphtha yield

Light cycle oil yield

Bottoms yield

Coke yield

Conversion

Reactor outlet temperature

Combined

Solution 1 out of 100

S18. Desirability plot showing optimized process conditions using CCD for objective 9

A:Feed flow rate(tonne/h) = 160.044

160

195

B:Feed temperature(K) = 531.836

481.5

588.5

C:Feed pressure = 494.994

405

495

D:Reg air blower disch temp(K) = 474.96

388

475

E:Catalyst circulation rate(tonne/h) = 1056.59

917

1121

Light end products yield(%) = 31.78

14.1878

49.2011

Naphtha yield(%) = 33.4939

17.1764

40.8495

Light cycle oil yield(%) = 17.18

16.3393

22.2913

Bottoms yield(%) = 10.8052

10.6062

22.7237

Coke yield(%) = 5.83963

4.79864

6.45388

Conversion(%) = 71.9908

54.985

72.7845

Reactor outlet temperature(K) = 834.109

763.88

851.05

Desirability = 0.702

Solution 1 out of 100

S19. Optimization ramps showing optimized process conditions using CCD for objective 10

1

1

1

1

1

0.502442

0.689283

1

1

1

1

1

0.702254

Desirability

0.000

0.250

0.500

0.750

1.000

A:Feed flow rate

B:Feed temperature

C:Feed pressure

D:Reg air blower disch temp

E:Catalyst circulation rate

Light end products yield

Naphtha yield

Light cycle oil yield

Bottoms yield

Coke yield

Conversion

Reactor outlet temperature

Combined

Solution 1 out of 100

S20. Desirability plot showing optimized process conditions using CCD for objective 10

A:Feed flow rate(tonne/h) = 194.981

160

195

B:Feed temperature(K) = 588.486

481.5

588.5

C:Feed pressure(kPa) = 448.558

405

495

D:Reg air blower disch temp(K) = 475

388

475

E:Catalyst circulation rate(tonne/h) = 1078.13

917

1121

Light end products yield(%) = 24.0998

14.1878

49.2011

Naphtha yield(%) = 37.0995

17.1764

40.8495

Light cycle oil yield(%) = 19.1805

16.3393

22.2913

Bottoms yield(%) = 13.8252

10.6062

22.7237

Coke yield(%) = 5.07951

4.79864

6.45388

Conversion(%) = 67.1124

54.985

72.7845

Reactor outlet temperature(K) = 823.53

763.88

851.05

Desirability = 0.503

Solution 1 out of 100

S21. Optimization ramps showing optimized process conditions using CCD for objective 11

1

1

1

1

1

0.283091

0.943168

0.477353

1

1

1

1

0.503251

Desirability

0.000

0.250

0.500

0.750

1.000

A:Feed flow rate

B:Feed temperature

C:Feed pressure

D:Reg air blower disch temp

E:Catalyst circulation rate

Light end products yield

Naphtha yield

Light cycle oil yield

Bottoms yield

Coke yield

Conversion

Reactor outlet temperature

Combined

Solution 1 out of 100

S22. Desirability plot showing optimized process conditions using CCD for objective 11

| S23 Table: Validation of CCD model with Aspen HYSYS model values for ±12% of base case design value. | | | | | | | | | | | | | |
| --- | --- | --- | --- | --- | --- | --- | --- | --- | --- | --- | --- | --- | --- |
| **Run** | **FF** | **TF** | **PF** | **TA** | **FC** | **Model** | **YLE** | **YN** | **YLCO** | **YB** | **YC** | **Conv** | **TR** |
| **(tonne/h)** | **(K)** | **(KPa)** | **(K)** | **(tonne/h)** | **(%)** | **(%)** | **(%)** | **(%)** | **(%)** | **(%)** | **(K)** |
| 1 | 198.8 | 470.8 | 396 | 483.28 | 896.72 | CCD | 16.49 | 30.66 | 22.88 | 24.46 | 5.13 | 52.73 | 760.53 |
| HY | 13.78 | 33.85 | 22.66 | 23.81 | 5.15 | 53.54 | 760.50 |
| 2 | 156.2 | 599.2 | 396 | 483.28 | 1141.28 | CCD | 56.36 | 12.03 | 15.08 | 10.96 | 5.27 | 74.21 | 858.51 |
| HY | 57.97 | 8.80 | 16.12 | 10.92 | 5.22 | 72.96 | 857.60 |
| 3 | 156.2 | 470.8 | 504 | 483.28 | 1141.28 | CCD | 32.07 | 34.62 | 16.73 | 10.36 | 6.42 | 73.59 | 836.00 |
| HY | 32.04 | 33.90 | 16.45 | 10.35 | 6.38 | 73.20 | 835.20 |
| 4 | 156.2 | 470.8 | 396 | 483.28 | 896.72 | CCD | 18.73 | 42.09 | 19.28 | 13.77 | 6.05 | 67.36 | 803.43 |
| HY | 19.07 | 40.96 | 19.37 | 13.79 | 6.02 | 66.84 | 802.96 |
| 5 | 198.8 | 599.2 | 396 | 483.28 | 1141.28 | CCD | 27.53 | 35.78 | 18.68 | 13.10 | 5.06 | 68.83 | 830.81 |
| HY | 26.88 | 35.71 | 18.32 | 13.20 | 5.04 | 68.48 | 830.80 |
| 6 | 156.2 | 599.2 | 504 | 483.28 | 896.72 | CCD | 33.25 | 32.37 | 17.63 | 11.51 | 5.19 | 71.26 | 835.83 |
| HY | 32.82 | 32.22 | 17.31 | 11.57 | 5.19 | 71.12 | 835.70 |
| 7 | 198.8 | 599.2 | 504 | 379.72 | 896.72 | CCD | 16.52 | 38.28 | 21.52 | 18.85 | 4.76 | 59.98 | 797.39 |
| HY | 17.12 | 36.64 | 21.68 | 19.06 | 4.72 | 59.26 | 797.05 |
| 8 | 198.8 | 470.8 | 504 | 379.72 | 896.72 | CCD | 17.55 | 27.94 | 23.17 | 25.81 | 5.17 | 51.07 | 752.24 |
| HY | 13.28 | 33.46 | 22.71 | 24.60 | 5.21 | 52.69 | 751.90 |
| CCD-Central Composite Design, HY-Aspen HYSYS | | | | | | | | | | | | | |
